# Supplementary material
Source: PubMed Central journal article supplement (PMC4385404)

Supplemental figure e1

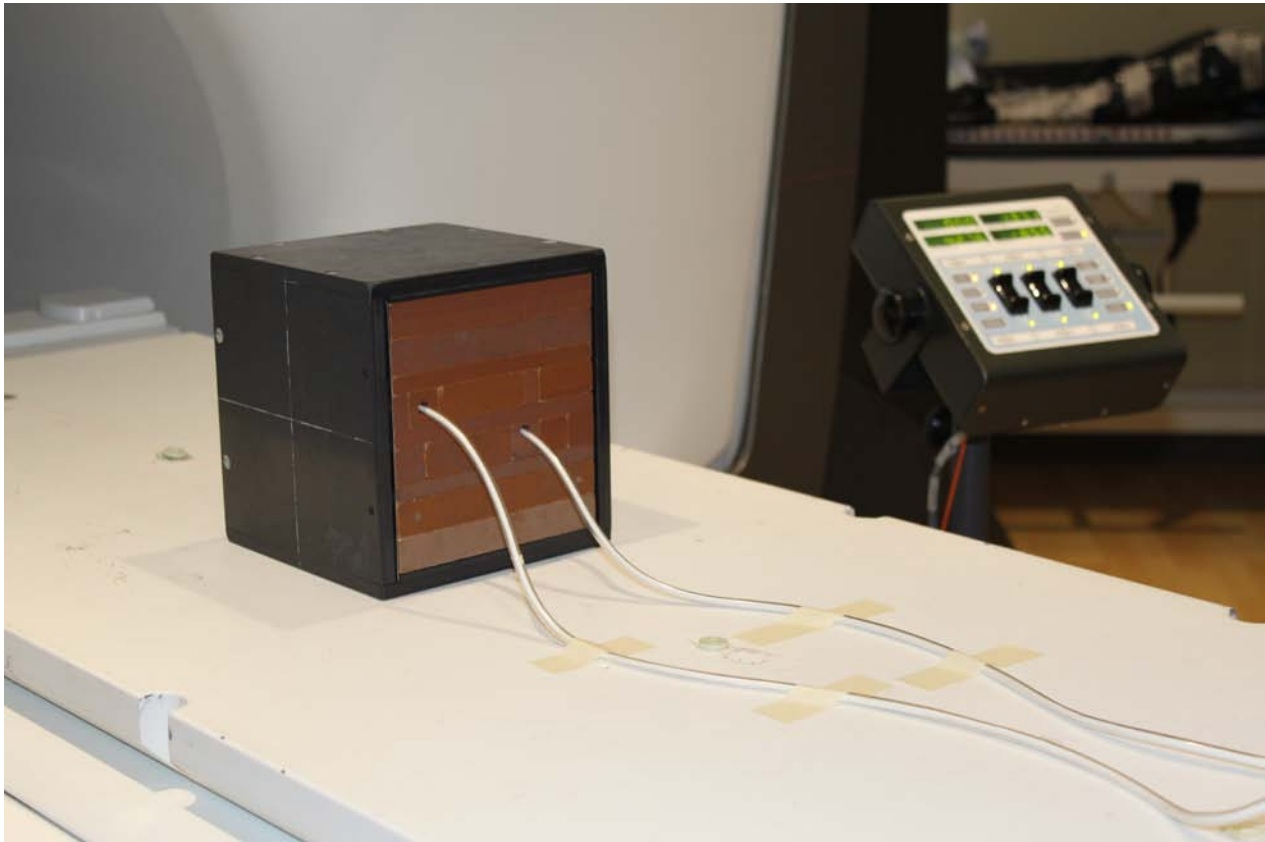

Supplemental figure e2

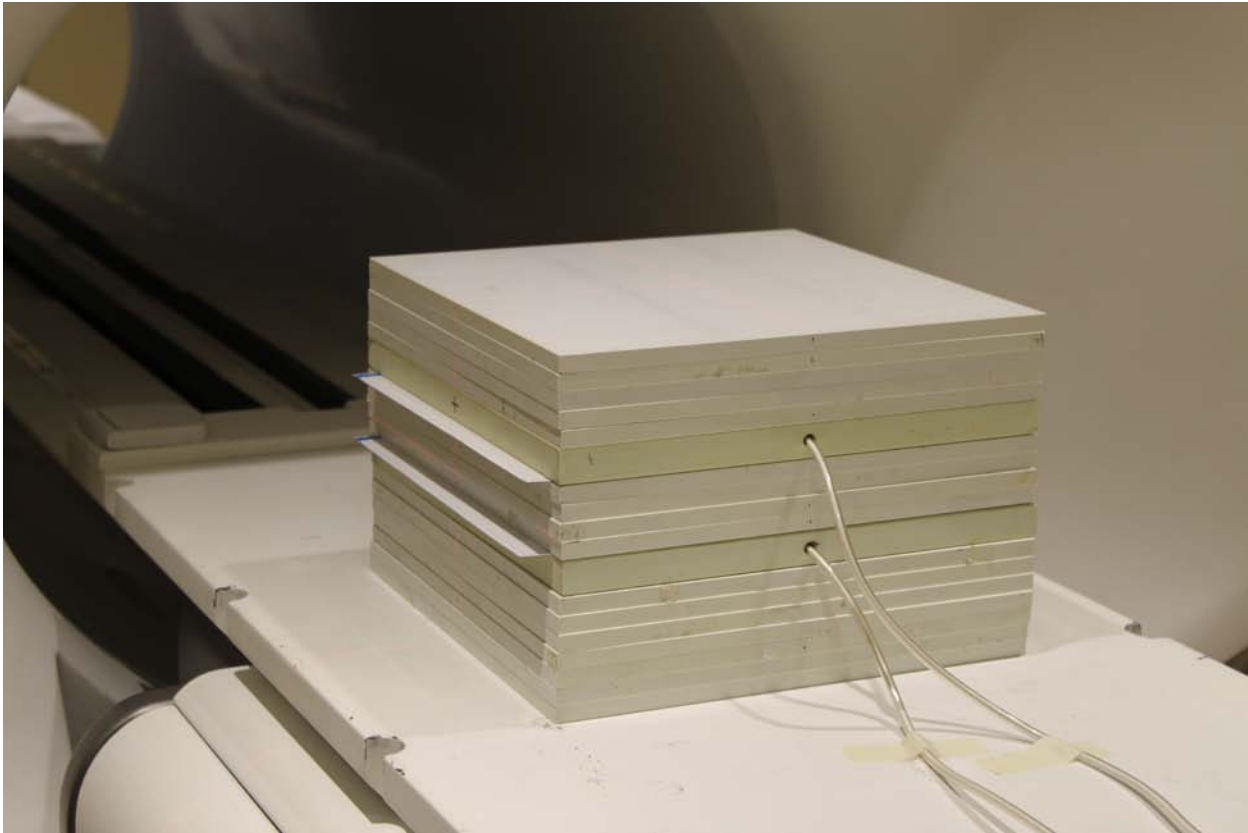

Supplemental figure e3

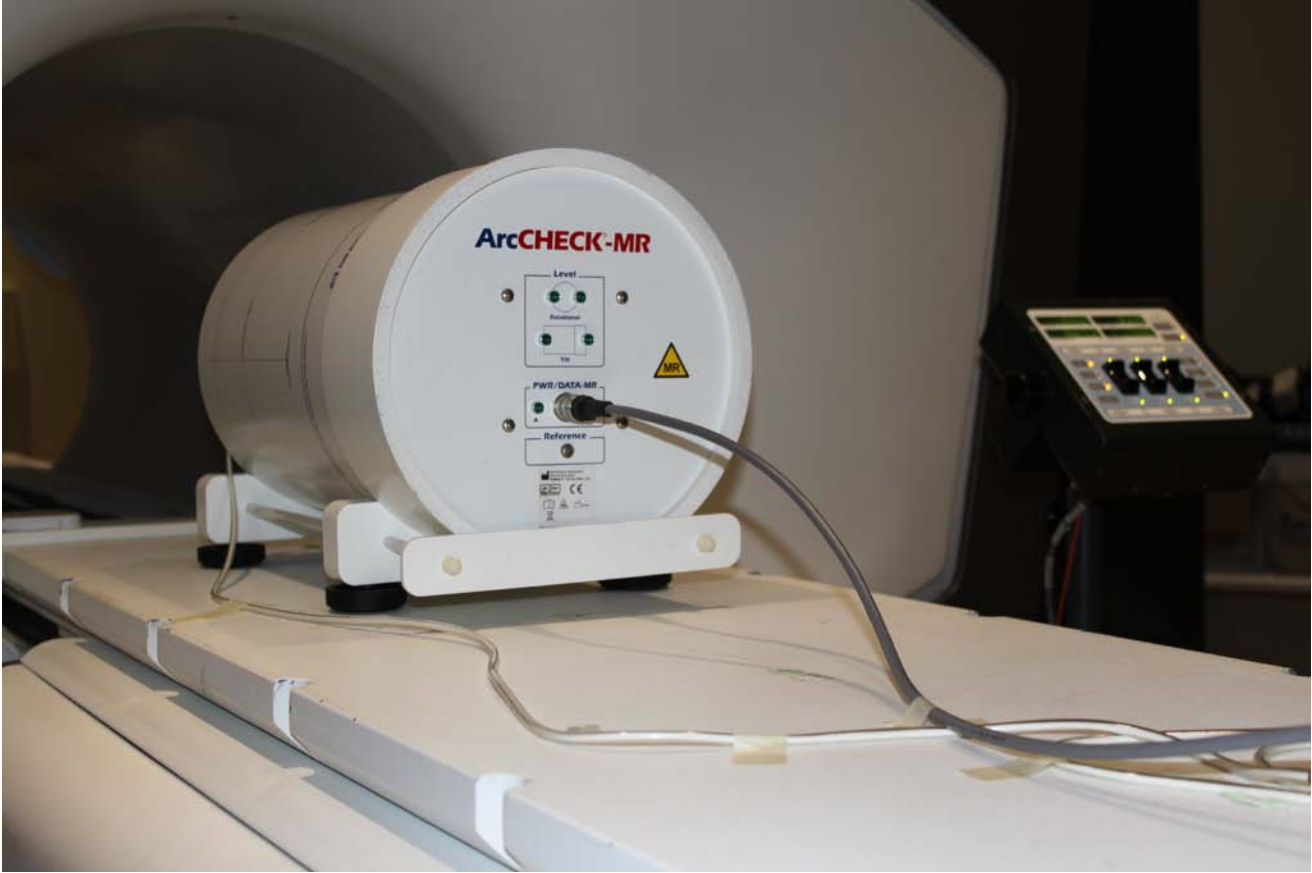

Supplement: NIHMS628212-supplement.pdf [file NIHMS628212-supplement.pdf]
